# Supplementary material for: Growing Slowly 1 locus encodes a PLS-type PPR protein required for RNA editing and plant development in Arabidopsis
Source: PubMed Central journal article supplement (PMC5066490; doi:10.1093/jxb/erw331), 2016-09-26
Supplement: supp_erw331_Supplementary_Figures_S1_S4_Supplementary_Tables_S1_S4.pdf [file supp_erw331_Supplementary_Figures_S1_S4_Supplementary_Tables_S1_S4.pdf]

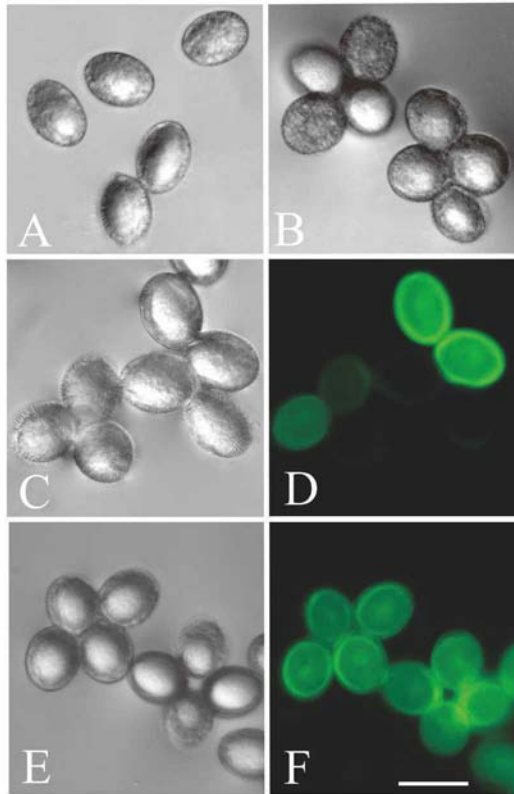

Figure S1 Rapid identification of heterozygous and homozygous mutant lines through pollen fluorescence. (A) *Arabidopsis thaliana* mature pollen grains of wild type. (B) The *qrt1* mature pollen grains maintain male meiotic products in tetrads. (C and D) Mature pollen grains of a heterozygous T-DNA insertion mutant. Two of four pollen grains from the same meiotic product are fluorescent; (E and F) Mature pollen grains of a homozygous T-DNA insertion mutant plant screened in T2 generation. The four pollen grains from the same meiotic product are fluorescent. Scale bar = 20 $\mu$ m.

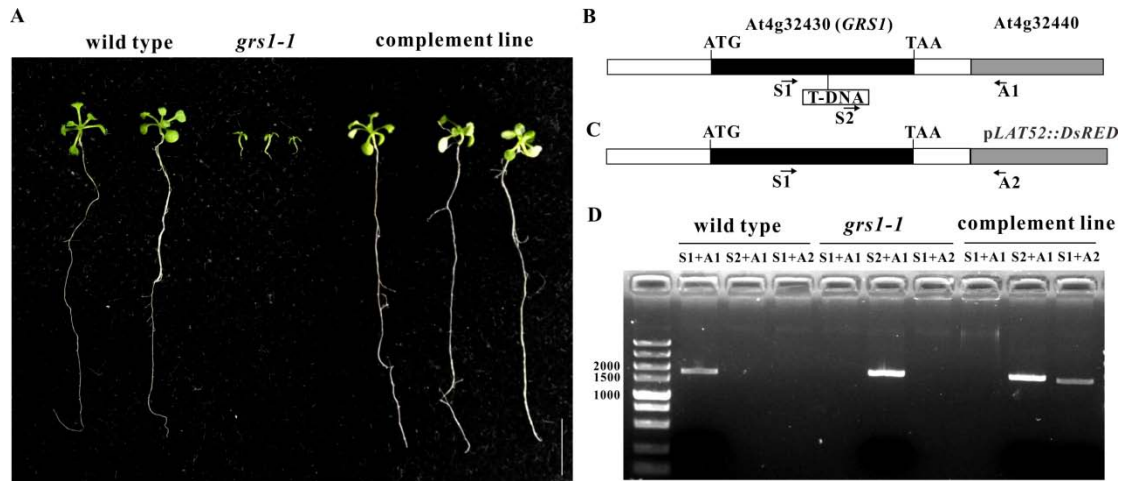

Figure S2 Genomic complementary fragment of At4g32430 rescues the phenotype of *grs1-1*.

A 11-day-old seedlings of wild type, *grs1-1* and the complemented line. Compared to wild type seedlings, *grs1-1* seedlings showed an extremely slow growth phenotype. Size of seedlings of the complemented line (homozygous for *grs1-1*, heterozygous for the genomic fragment) is similar to wild type seedlings. Scale bar = 1 cm.

B Diagram of the *GRS1* (At4g32430) genomic DNA and the insertion sites for the T-DNA in *grs1-1*. The location of primers S1, S2 and A1 used for genotyping are indicated by arrows.

C Diagram of the *GRS1* genomic complementary fragment and additional T-DNA element. The location of primers S1 and A2 used for genotyping are indicated by arrows.

D Genotypes of wild type, *grs1-1* and complemented line. Wild type shows a product of about 1700 bps (S1+A1). Homozygous *grs1-1* plants show a product of about 1800 bps (S2+A1). The complemented line shows two products of about 1800 bps (S2+A1) and 1700 bps (S1+A2).

|                       |      |   |          |   |   |     |   |   |     |   |          |    |   |   |   |   |          |   |   |   |   |   |          |          |   |   |   |   |
|-----------------------|------|---|----------|---|---|-----|---|---|-----|---|----------|----|---|---|---|---|----------|---|---|---|---|---|----------|----------|---|---|---|---|
| motifs                |      | L | S        | P | L | S   | P | L | S   | P | L        | S  | P | L | S |   |          |   |   |   |   |   |          |          |   |   |   |   |
| Residue no.<br>within | 2nd  | D | C        | V | F | V   | I | V | E   | V | V        | S  | I | Y | V | F | V        | E |   |   |   |   |          |          |   |   |   |   |
|                       | 5th  | T | N        | N | S | N   | N | T | N   | T | V        | N  | N | G | S | T | L        | S |   |   |   |   |          |          |   |   |   |   |
|                       | 35th | F | D        | D | D | D   | D | L | N   | N | E        | E  | N | C | N | D | S        | G |   |   |   |   |          |          |   |   |   |   |
|                       |      |   | -20      |   |   | -15 |   |   | -10 |   |          | -5 |   |   |   |   | +5       |   |   |   |   |   |          |          |   |   |   |   |
| <i>nad1-265</i>       | A    | U | <b>U</b> | U | A | U   | G | U | U   | A | <b>A</b> | G  | U | C | U | G | <b>G</b> | U | C | G | C | U | C        | <b>G</b> | G | G | C | C |
| <i>nad4L-55</i>       | G    | A | <b>U</b> | U | A | U   | U | U | C   | U | <b>A</b> | U  | U | U | U | A | <b>G</b> | G | U | A | U | U | C        | <b>G</b> | G | G | G | A |
| <i>nad6-103</i>       | U    | U | <b>U</b> | G | U | U   | U | C | C   | C | <b>A</b> | U  | C | C | C | A | <b>G</b> | U | C | U | U | U | C        | <b>G</b> | C | G | A | C |
| <i>rps4-377</i>       | A    | C | <b>U</b> | A | U | U   | C | C | U   | C | <b>A</b> | A  | G | C | A | A | <b>G</b> | G | C | A | G | C | C        | <b>G</b> | A | U | A | A |
| <hr/>                 |      |   |          |   |   |     |   |   |     |   |          |    |   |   |   |   |          |   |   |   |   |   |          |          |   |   |   |   |
| <i>nad4-403</i>       | A    | U | U        | U | C | U   | A | A | U   | G | A        | U  | C | G | C | C | G        | U | G | U | U | C | <b>C</b> | G        | C | A | U | G |

Figure S3 Putative coordination of PPR motifs of GRS1 and RNA nucleotides around the editing sites targeted by GRS1.

Top: PPR motifs of GRS1 and their corresponding residues at the 3rd, 6th of one PPR motif and 1th positions of the next motif (1'). Bottom: alignment of the putative cis-specificity regions around the RNA editing sites targeted by GRS1. Editing at *nad1-265*, *nad4L-55*, *nad6-103* and *rps4-377* were inhibited in *grs1*. The edited C is shown in bold and the five nucleotides shared between the four sites are highlighted in grey. Another editing sites, *nad4-403*, share the same five nucleotides, but its editing is not affected in *grs1*. The last S motif of GRS1 is positioned at the -4 nucleotides of edited C.

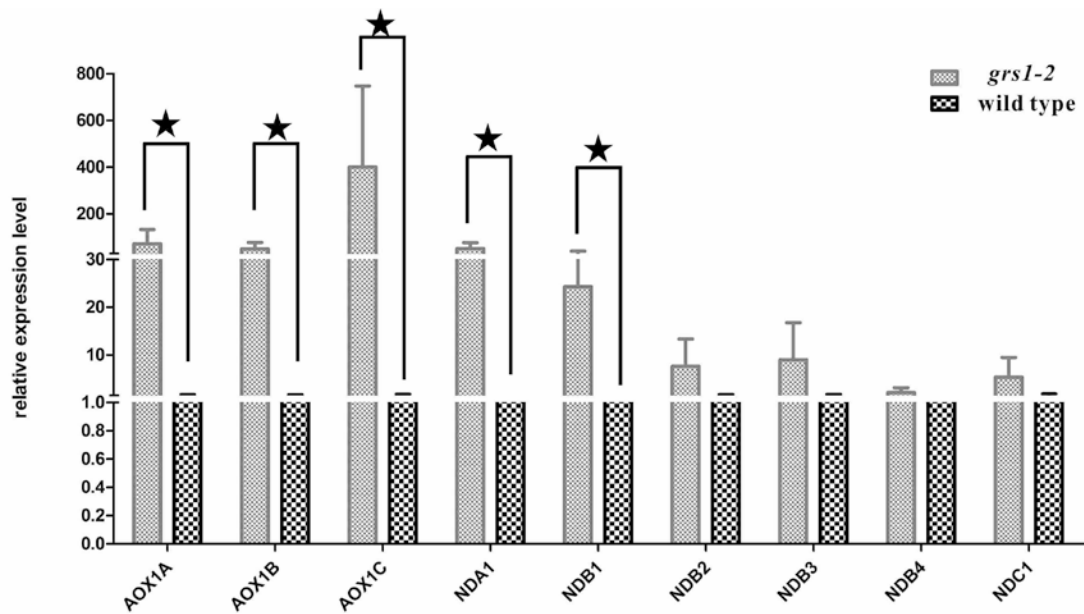

Figure S4 Relative expression of alternative pathway genes in wild type and *grsI-2*. The expression levels of alternative respiratory pathway genes in *grsI-2* increased significantly relative to WT. These genes include three alternative oxidases (AOXs) and six alternative NAD(P)H dehydrogenases (NDs). The values obtained were averaged for three independent experiments, with error bars representing SD. Statistically significant differences between *grsI-2* and wild type are indicated by asterisks (Student's t test;  $P < 0.01$ ).

Table S1 PLS repeat structure of At4g32430

| Location | Motif                                                     | Amino acid code |     |      | Classes |
|----------|-----------------------------------------------------------|-----------------|-----|------|---------|
|          |                                                           | 2nd             | 5th | 35th |         |
| 76-110   | MDEVTLCLALKACRGDLKRGCOIHGFST                              | D               | T   | F    | L1      |
| 111-141  | VCVSNVAVMGMYSRKAGRFDNALCIFENL                             | C               | N   | D    | S1      |
| 142-173  | VVSWNTILSGFDDNOIALNFVVRMKSAG                              | V               | N   | D    | P1      |
| 174-208  | AFTYSTALSFCVGVSEGFLGLLOLOSTVVK                            | F               | S   | D    | L1      |
| 209-239  | LVVGNSFITMYSRSGSFRGARRVFDEMSF                             | V               | N   | D    | S1      |
| 240-275  | MISWNSLLSGLSQEGTFGFVAVVIFRDMM                             | I               | N   | D    | P1      |
| 276-310  | HVSFTSVITTCCHETDLKLARQIHGLCIKR                            | V               | T   | L    | L1      |
| 311-341  | LEVGNILMSRYSKCGVLEAVKSVFHOMS                              | E               | N   | N    | S1      |
| 342-371  | VVSWTTMISSNKDDAVSIFLNMRFDDGVY                             | V               | T   | N    | P1      |
| 372-406  | EVTFFVGLINAVKCNQIIEGLKIHGLCIKT                            | V               | V   | E    | L1      |
| 407-437  | PSVGNISFITLYAKFEALEDKAFEDITFR                             | S               | N   | E    | S1      |
| 438-471  | IISWNAMEISGFAQNGFSHEALKMFLSAAA                            | I               | N   | N    | P2      |
| 472-508  | EYTFGSVLNIAIFAEDISVKQGRCHAHL                              | Y               | G   | C    | L2      |
| 509-539  | PVVSSALLDMYAKRGNIDSEKVFNEMS                               | V               | S   | N    | S2      |
| 540-573  | QFVWTSIISAYSSHGDFETVMNLFHKMIK                             | F               | T   | D    | P2      |
| 575-610  | LVTFLSVLTACNRKGMVDKGYEIFNMMI                              | V               | L   | S    | L2      |
| 611-642  | HEHYSCMVDMLGRAGRLKEAEELMSEV                               | E               | S   | G    | S2      |
| 643-676  | ESMLQSMGLGSCRLHGNVKGAKVAELA                               | S               | O   | L    | E1      |
| 677-710  | SGSYVOMYNIYAEKEEWDKAAEIRKAM                               | G               | V   | K    | E2      |
| 711-763  | EAGFSWIDVGDTEGSLTMQGFSSGDKSHP<br>KSDEIYRMVEIIGLEMNLEGKVAV | A               | S   | V    | DY<br>W |

Table S2 The root length of 8-day-old seedlings

| genotype             | Mean root length (mm) |
|----------------------|-----------------------|
| wild type            | 42.5 ± 2.6            |
| <i>grs1-1</i>        | 1.9 ± 0.4             |
| <i>grs1-1 abi5-1</i> | 3.7 ± 0.4             |
| <i>grs1-1 gin1-3</i> | 1.8 ± 0.3             |

Table S3 Primes for analysis of RNA editing

| Gene          | Primers (5' to 3')                                                                |
|---------------|-----------------------------------------------------------------------------------|
| <i>atp1</i>   | atp1-F1: AGAGCTGCGGAACTAACGAATCTA<br>atp1-R1: AAAGCATCTGGTTCATTTTTCTT             |
| <i>atp6-1</i> | atp6-1-F1: ATGCGACGAATCTTTTTGTTTGA<br>atp6-R1: CCAAGCGAACCCACTTAAAATCTT           |
| <i>atp9</i>   | atp9-F1: ATGACAAAGCGTGAGTATAATTCTCAAC<br>atp9-R1: TCAGAATACGAATAAGATCAAAAAGGCCATC |
| <i>ccb203</i> | ccb203-F1: TGGACACGGGGAGGGAGCAG<br>ccb203-R1: CATAACATAACGGGGCGGGGTTG             |
| <i>ccb206</i> | ccb206-F1: AACCAGCCTTGAAGTGAATG<br>ccb206-R1: GAATCGAGGGTCCAGAAGAG                |
| <i>ccb256</i> | ccb256-F1: CTACGCGCAAATTCTCATTGG<br>ccb256-R1: GAGCGAGTGAAGTACTAGTTTTGGTA         |
| <i>ccb382</i> | ccb382-F1: AATCTTGAAATGAGCACGAAATGTC<br>ccb382-R1: CAGTACCTTTTAGTCGAGTGGCTTC      |
| <i>ccb452</i> | ccb452-F1: TATGCAATTATGAACTCCACGGAAC<br>ccb452-R1: ATAGAGCAGATGGTCCAACACTACATAAC  |
| <i>cob</i>    | cob-F1: TGAATAAGGAACCAACGATTCTC<br>cob-R1: AGGTGTGATCAGTCTCATCCGTG                |
| <i>coxII</i>  | coxII-F1: GATTGTTCTAAAATGGTTATTCCTCAC<br>coxII-R1: GGTTTGGGGGATTAATTGATTG         |
| <i>coxIII</i> | coxIII-F1: TACCTCCCACCAATAGATAGAGAC<br>coxIII-R1: TTATGATTGAATCTCAGAGGCATTC       |
| <i>matR</i>   | matR-F1: GAAGTTTAGACCGCTCACAGTAG<br>matR-R1: GTAGTTGAGTGTTCTTCTTGTTG              |
| <i>nad1</i>   | nad1-F1: CCAGCTGAAATACTTGAATAAT<br>nad1-R1: AAAGGTGACTAAAAGACCAGAAAC              |
| <i>nad2</i>   | nad2-F1: CGTTCGATCCTCCCACAC<br>nad2-R1: TGAGTGCCATTTGATGAGTAACTG                  |
| <i>nad3</i>   | nad3-F1: CCATTTTGTGCCCTATCACTTTAC<br>nad3-R1: GCTGTAATGATGTCAGAATTTGCAC           |
| <i>nad4</i>   | nad4-F1: TTGCCATGTTGCACTAAGTTAC<br>nad4-R1: CTTCAATGTTGATTCTACTCTATG              |
| <i>nad4L</i>  | nad4L-F1: GTTCCCGAAATGGATCTTATCAAAT<br>nad4L-R1: GGAGAGGAATGGTTAACCTTGAATG        |
| <i>nad5</i>   | nad5-F1: GATTATTATTCTTGACTTGACTTTG<br>nad5-R1: CGATATGATGATTGGTTTAGGTAC           |
| <i>nad6</i>   | nad6-F1: GTAGATCGTGAGTGGGTCAGTCGTC<br>nad6-R1: CCATGATACTTTCTGTTTTGTCGAG          |

*nad7* nad7-F1: TCCCATGACGACTAGGAAAAGG  
nad7-R1: CCTATCTATCCACCTCTCCAAACAC

*nad9* nad9-F1: GTTCCAAGGACTAGCAAATC  
nad9-R1: TCATTTTCAAATATAGTTGGGAGAC

*orf\** *orf\**-F1: CATTAGCGGCTCATAAACCATG  
*orf\**-R1: ATTTAGATCTCGGAGATCCCTTTC

*orf25* *orf25*-F1: CCACCAAGCTCTCTCGAATG  
*orf25*-R1: TACGAATATGGATGGTAGAAAGATG

*orf114* *orf114*-F1: CTAGCAGACTAATCACTAAATAGATAG  
*orf114*-R1: AGTCCTTGGAGCGTCTTTATG

*orf240A* *orf240A*-F1: CCCTGAGTCGATCTCGCTG  
*orf240A*-R1: TGCGTAGTAGCGTTCTAAGATCAC

*orfB* *orfB*-F1: ATCTAATCATGCCTCAACTGG  
*orfB*-R1: AGAATCATTTTATGCTTCCTTG

*orfX* *orfX*-F1: ATCCTTCACTTTTAGCTTTGAATTAC  
*orfX*-R1: ATTGATAGTTACTTTGCCAGGTTC

*rpl2* *rpl2*-F1: AGCACTTCTCTATGGGCATTGTA  
*rpl2*-R1: TGCCTGCTTCTAATTGATGACTGG

*rpl5* *rpl5*-F1: ATGTTTCCACTCAATTTTCATTAC  
*rpl5*-R1: GAGTTTCCCCCTCATCTTTT

*rpl16* *rpl16*-F1: AAAATCGATTATGCTCCTG  
*rpl16*-R1: TACGACCACTGAACAAACTT

*rps3* *rps3*-F1: AATCCGATTTTCGGTAAGACTT  
*rps3*-R1: CGTTTTCGGATATAGCACGTC

*rps4* *rps4*-F1: GGCTGCTTAAAAAACTGATTC  
*rps4*-R1: TGTCCCTATGAGTGACTACGC

*rps7* *rps7*-F1: GGGGGCTTGGATGGTGA  
*rps7*-R1: ATCTGAAATGCGCGAAACTT

*rps12* *rps12*-F1: TCAATTGATTCGTCATGGTAGAGA  
*rps12*-R1: TCATATCGATTTGGGTTTTTCTGC

*rps14\** *rps14*-F1: ATGTCGTAGAAGCAAATAGTAGA  
*rps14*-R1: TTATGCCCATCAAAGAACC

$\Psi$ *sdh4\**  $\Psi$ *sdh4*-F: ATGAAGGAACGAAAGAGTGG  
 $\Psi$ *sdh4*-R: CCAAGATCTAATTTTCGGGTC

---



Table S4 Primes for quantitative RT-PCR

| Gene           | Primers (5' to 3')                                                              |
|----------------|---------------------------------------------------------------------------------|
| <i>ABI5</i>    | ABI5-D1:ACTTGAGGATTTCTTGGTGAAGG<br>ABI5-D2:CCTTGAAACACACCATAAAGCTG              |
| <i>ABI3</i>    | GTAAGACAACCGAGCGGACAA<br>CATTCGCCGACGGAGAGTTAT                                  |
| <i>GRS1</i>    | GRS1-D1:AGATCAGGAAAGCAATGAGGAAG<br>GRS1-D2:GAAACCTTGCATCGTTAAAGACC              |
| <i>MT18S</i>   | mt 18S rRNA-1: TCAGCATGCCGCGGTGAATATG<br>mt 18S rRNA-2: TGCTTCGGGCGAAACCAATTCC  |
| <i>MT26S</i>   | mt 26S rRNA-1: TGCGAGGTGGGTAGTTTATC<br>mt 26S rRNA-2: GGCAGGCTTATACCATTACG      |
| <i>CHL 16S</i> | chl 16S rRNA-1: GCGTAGAGATCGGAAAGAAC<br>chl 16S rRNA-2: GGGTATCTAATCCCATTTCGC   |
| <i>CHL 23S</i> | chl 23S rRNA-1: CTATAACGGTCCTAAGGTAGCG<br>chl 23S rRNA-2: CTATTTACCGAGCCTCTCTC  |
| <i>AOX1A</i>   | AOX1A-D1:GACGGTCCGTACGGTTTCG<br>AOX1A-D2:CTTCTGATTCGCGTCCTCCT                   |
| <i>AOX1B</i>   | AOX1B-D1:TGGAGACTTGAAGCTGATGC<br>AOX1B-D2:TCTTTTAGCTCACGACCTTGG                 |
| <i>AOX1C</i>   | AOX1C-D1:GCATCAAAGCAAGCGACATCC<br>AOX1C-D2:TGGCTTCACGCCCAATAAC                  |
| <i>NDA1</i>    | NDA1-D1:GTCCGTGAGAGCAAGGAAGG<br>NDA1-D2:GGCGAAGTGGAGGGGATATG                    |
| <i>NDB1</i>    | NDB1-D1:CTGTGACTGATAAAGATATC<br>NDB1-D2:GCCAACTGCATATACATTC                     |
| <i>NDB2</i>    | NDB2-D1:CTGACTCTCTCAAAGAGTTCC<br>NDB2-D2:CGATTTGAACTCTTCGATC                    |
| <i>NDB3</i>    | NDB3-D1:GCAAATCCATCATATAGCAAC<br>NDB3-D2:CAAGGGAGTGAAAGCAAAG                    |
| <i>NDB4</i>    | NDB4-D1:TCAAGTCTTAAGGGCACAACA<br>NDB4-D2:CGGAAGAGAGAGGCTCTCTCG                  |
| <i>NDC1</i>    | NDC1-D1:TCCATAAAGAGAGCAAGCAAC<br>NDC1-D2:CGAATCACCTAATGCAAATATC                 |
| <i>UBQ10</i>   | UBQ10-D1: GGCCTTGTATAATCCCTGATGAATAAG<br>UBQ10-D2: AAAGAGATAACAGGAACGGAAACATAGT |
